# Supplementary material
Source: ML conference proceedings conference paper supplement (https://proceedings.neurips.cc/paper_files/paper/2023/hash/b14d76c7266be21b338527cd25deac45-Abstract.html)
Supplement: Supplementary file 1 [file b14d76c7266be21b338527cd25deac45-Supplemental-Conference.pdf]

## Proofs

*proof of Theorem (2.1).* By (2.4),  $\text{Mat}_S(X)$  is a spiked matrix with aspect ratio  $N(S)^2/N_1$  and signal strength  $\lambda$  (as  $\otimes_{j \in S} v_j$  is unit norm). There are four cases to consider:

- Let  $N(S)^2/N_1 \rightarrow 0$ ; by the first point of (1.6), the recovery threshold lies at  $(N_1/N(S) \cdot N(S))^{1/4} = N_1^{1/4}$ .
- Let  $N(S)^2/N_1 \rightarrow \gamma \in (0, 1]$ ; by the first point of (1.5), partial recovery occurs for  $\liminf \lambda/\sqrt{N_1/N(S)} > \gamma^{1/4}$ . Equivalently,  $\liminf \lambda/N_1^{1/4} > 1$ . Under  $\lambda = \tau(1+o(1))N_1^{1/4}$ ,  $\lim \lambda/\sqrt{N_1/N(S)} = \tau\gamma^{1/4}$ , implying  $|\langle \otimes_{j \in S} v_j, w \rangle|^2 \xrightarrow{a.s.} c^2(\tau\gamma^{1/4}, \gamma)$ .
- Let  $N(S)^2/N_1 \rightarrow \gamma \in (1, \infty]$ ; by the second point of (1.5), partial recovery occurs for  $\liminf \lambda/\sqrt{N(S)} > \gamma^{-1/4}$ . Equivalently,  $\liminf \lambda/N_1^{1/4} > 1$ . Under  $\lambda = \tau(1+o(1))N_1^{1/4}$ ,  $\lim \lambda/\sqrt{N(S)} = \tau\gamma^{-1/4}$ , implying  $|\langle \otimes_{j \in S} v_j, w \rangle|^2 \xrightarrow{a.s.} c^2(\tau\gamma^{-1/4} \cdot \gamma^{1/2}, \gamma) = c^2(\tau\gamma^{1/4}, \gamma)$ .
- Let  $N(S)^2/N_1 \rightarrow \infty$ ; by the second point of (1.7), the recovery threshold lies at  $\sqrt{N(S)}$ .

□

*Proof of Theorem 3.1.* We provide proof for  $k = 3$ ; the proof for higher orders is similar and omitted. For notational simplicity, we suppress the subscripts of  $n_1$  and  $v_1$ .

Let  $w_i = \text{tr}(Z_i)$ ,  $i \in [n]$ , and  $w = (w_1, \dots, w_n)^\top$ . Expanding the partial trace matrix,

$$\begin{aligned} \text{Tr}_k(X) &= \sum_{i=1}^n (\lambda v_i + w_i) X_i = \sum_{i=1}^n [(\lambda^2 v_i^2 + \lambda v_i w_i) v v^\top + (\lambda v_i + w_i) Z_i] \\ &= \sum_{i=1}^n [(\lambda^2 v_i^2 + \lambda v_i w_i) v v^\top + (\lambda v_i + w_i)(Z_i - \text{diag}(Z_i - \tilde{Z}_i)) + (\lambda v_i + w_i) \text{diag}(Z_i - \tilde{Z}_i)], \end{aligned} \quad (4.4)$$

where  $\tilde{Z}$  is an independent copy of  $Z$ .

Let  $M = \|\lambda v + w\|_2^{-1} \sum_{i=1}^n (\lambda v_i + w_i)(Z_i - \text{diag}(Z_i - \tilde{Z}_i))$ . As  $w_i$  and  $Z_i - \text{diag}(Z_i - \tilde{Z}_i)$  are independent and the Gaussian distribution is rotationally invariant,  $M \stackrel{d}{=} Z_1$ . Hence, we have

$$\|\lambda v + w\|_2^{-1} \text{Tr}_k(X) = \alpha v v^\top + M + \|\lambda v + w\|_2^{-1} \sum_{i=1}^n (\lambda v_i + w_i) \text{diag}(Z_i - \tilde{Z}_i), \quad (4.5)$$

where  $\alpha = \|\lambda v + w\|_2^{-1} (\lambda^2 + \lambda \langle v, w \rangle)$ . The partial trace matrix is thus proportional to a perturbation of a spiked matrix with aspect ratio  $\gamma = 1$ .

Let  $\mathcal{E}$  denote the third term on the right-hand side of (4.5); we shall prove  $n^{-1/2} \|\mathcal{E}\|_2 \xrightarrow{a.s.} 0$ . Denoting  $u = (\lambda v + w)/\|\lambda v + w\|_2$ , the diagonal entries of  $\sum_{i=1}^n u_i \text{diag}(\tilde{Z}_i)$  are i.i.d. Gaussians with variance one, implying  $\|\sum_{i=1}^n u_i \text{diag}(\tilde{Z}_i)\| \lesssim \sqrt{\log n}$ , almost surely. Similarly, since  $w \sim \mathcal{N}(0, nI_n)$  and  $\|\lambda v + w\|_2 = \Theta_{a.s.}(\lambda + n)$ ,

$$\lambda \|\lambda v + w\|_2^{-1} \left\| \sum_{i=1}^n v_i \text{diag}(Z_i) \right\|_2 \lesssim \sqrt{\log n} \left(1 + \frac{\lambda}{n}\right). \quad (4.6)$$

To bound the remaining term of  $\mathcal{E}$ , let  $\mathcal{Z} \in \mathbb{R}^{n \times n}$  denote the matrix with entries  $\mathcal{Z}_{ij} = Z_{ijj}$ ,  $i, j \in [n]$ , in which case we may write

$$\left\| \sum_{i=1}^n w_i \text{diag}(Z_i) \right\|_2 = \sup_{1 \leq j \leq n} \left| \sum_{i=1}^n w_i Z_{ijj} \right| = \sup_{1 \leq j \leq n} |e_j^\top \mathcal{Z}^\top \mathcal{Z} \mathbf{1}_n|, \quad (4.7)$$

where  $\mathbf{1}_n$  is the length- $n$  vector of ones. As  $e_j^\top \mathcal{Z}^\top \mathcal{Z} e_j \sim \chi_n^2$  and

$$e_j^\top \mathcal{Z}^\top \mathcal{Z} (\mathbf{1}_n - e_j) \stackrel{d}{=} \sqrt{n-1} e_j^\top \mathcal{Z}^\top \tilde{Z} e_j \sim \sqrt{n-1} \cdot \mathcal{N}(0, 1) \cdot \sqrt{\chi_n^2},$$

standard bounds such as (2.19) in [24] yield

$$\mathbf{P}\left(\sup_{1 \leq j \leq n} |e_j^\top \mathcal{Z}^\top \mathbf{Z} \mathbf{1}_n - n| > c \cdot n\right) \lesssim n e^{-Cn}, \quad (4.8)$$

where  $c, C > 0$  are constants. As the right-hand side is summable, the Borel-Cantelli lemma implies

$$\sup_{1 \leq j \leq n} |e_j^\top \mathcal{Z}^\top \mathbf{Z} \mathbf{1}_n| \lesssim n, \quad (4.9)$$

almost surely. Collecting the above bounds, we have that  $n^{-1/2} \|\mathcal{E}\|_2 \xrightarrow{a.s.} 0$ .

By Weyl's inequality, the limiting spectral distribution of  $n^{-1/2}(M + \mathcal{E})$  equals that of  $n^{-1/2}M$ , the quarter circle law. The limits (1.5) from Lemma 1.1 therefore apply to  $\alpha v v^\top + M + \mathcal{E}$  as well (see [7]). Basic calculations yield (1)  $\liminf \alpha/\sqrt{n} > 1$  if and only if  $\liminf \lambda/n^{3/4} > 1$ , and (2) under  $\lambda = \tau(1 + o(1))n^{3/4}$ ,  $\alpha = \tau^2(1 + o_{a.s.}(1))\sqrt{n}$ . Therefore,  $\hat{v}$  partially recovers  $v$  if and only if  $\liminf \lambda/n^{3/4} > 1$ , and under  $\lambda = \tau(1 + o(1))n^{3/4}$ ,

$$|\langle v, \hat{v} \rangle|^2 \xrightarrow{a.s.} c^2(\tau^2, 1) = \hat{c}^2(\tau), \quad (4.10)$$

completing the proof.  $\square$

*Proof of Theorem 4.1.* By the linearity of the operators  $\times_1, \dots, \times_k$ ,

$$w_j = \lambda \prod_{\ell \in [k] \setminus \{j\}} \langle v_\ell, \hat{v}_\ell \rangle \cdot v_j + Z \times_1 \hat{v}_1 \cdots \times_{j-1} \hat{v}_{j-1} \times_{j+1} \hat{v}_{j+1} \cdots \times_k \hat{v}_k, \quad (4.11)$$

$$\langle v_j, w_j \rangle = \lambda \prod_{\ell \in [k] \setminus \{j\}} \langle v_\ell, \hat{v}_\ell \rangle + \langle Z, \hat{v}_1 \otimes \cdots \otimes \hat{v}_{j-1} \otimes v_j \otimes \hat{v}_{j+1} \cdots \otimes \hat{v}_k \rangle. \quad (4.12)$$

Assume that (4.1) holds for  $\ell \in [j-1]$ . For  $\ell \in \{j+1, \dots, k\}$ , Corollary 2.1.1 implies  $|\langle v_\ell, \hat{v}_\ell \rangle|$  is bounded away from zero. The first term on the right-hand side of (4.12) is therefore  $\Theta_{a.s.}(\lambda)$ . The second term is bounded by the spectral norm of  $Z$ : using Theorem 1 of [23],

$$\langle Z, \hat{v}_1 \otimes \cdots \otimes \hat{v}_{j-1} \otimes v_j \otimes \hat{v}_{j+1} \otimes \cdots \otimes \hat{v}_k \rangle \leq \sup_{u_j \in \mathbb{S}^{j-1}, j \in [k]} \langle Z, u_1 \otimes \cdots \otimes u_k \rangle \lesssim \sqrt{n_k}, \quad (4.13)$$

almost surely. Thus, as  $(\sqrt{n_k}/\lambda)^4 \lesssim n_k^2/N_1 \rightarrow 0$ ,

$$|\langle v_j, \hat{v}_j \rangle| = 1 + O_{a.s.}\left(\frac{\sqrt{n_k}}{\lambda}\right) \xrightarrow{a.s.} 1, \quad (4.14)$$

from which (4.1) follows inductively.

Equation (4.2) follows from (4.1) and (4.13), which imply  $\|v_1 \otimes \cdots \otimes v_k - \hat{v}_1 \otimes \cdots \otimes \hat{v}_k\|_F \xrightarrow{a.s.} 0$  and

$$\lambda^{-1} |\hat{\lambda}| = \left| \prod_{j=1}^k \langle v_j, \hat{v}_j \rangle + \lambda^{-1} \langle Z, \hat{v}_1 \otimes \cdots \otimes \hat{v}_k \rangle \right| \xrightarrow{a.s.} 1. \quad (4.15)$$

$\square$

*Proof of Theorem 4.2.* We shall prove  $v_2, \dots, v_k$  are recovered exactly; proofs for the first and last axes are similar and omitted. By the linearity of the unfolding operator,

$$\text{Mat}_{j-1}(X \times_1 \hat{v}_1) = \lambda \langle v_1, \hat{v}_1 \rangle (\otimes_{\ell \in [k] \setminus \{1, j\}} v_\ell) v_j^\top + \text{Mat}_{j-1}(Z \times_1 \hat{v}_1). \quad (4.16)$$

Observe that  $Z \times_1 \hat{v}_1$  is a reshaping of the vector  $\text{Mat}_1(Z) \hat{v}_1$ . As  $\hat{v}_1$  and  $Z$  are dependent, the second term on the right-hand side is not a matrix of i.i.d. entries. Despite dependencies, we claim that appropriately scaled,  $\text{Mat}_1(Z) \hat{v}_1$  is Gaussian noise, in which case exact recovery thresholds are a consequence of spiked matrix model results of Section 1.3 applied to (4.16).

By definition,  $\hat{v}_1$  is the first eigenvector of the symmetric matrix

$$\text{Mat}_1(X)^\top \text{Mat}_1(X) = \lambda^2 v_1 v_1^\top + \text{Mat}_1(Z)^\top \text{Mat}_1(Z) + \mathcal{E}, \quad (4.17)$$

where  $\mathcal{E}$  is a rank-two matrix given by

$$\mathcal{E} = \lambda v_1 (\otimes_{\ell \in [k] \setminus \{1\}} v_\ell)^\top \text{Mat}_1(Z) + \lambda \text{Mat}_1(Z)^\top (\otimes_{\ell \in [k] \setminus \{1\}} v_\ell) v_1^\top.$$

Let  $\tilde{v}_1$  denote the first eigenvector of  $\text{Mat}_1(X)^\top \text{Mat}_1(X) - \mathcal{E}$ ; without loss of generality, we assume  $\hat{v}_1^\top \tilde{v}_1 \geq 0$ . Since  $\text{Mat}_1(Z)^\top (\otimes_{\ell \in [k] \setminus \{1\}} v_\ell) \sim \mathcal{N}(0, I_{n_1})$ , we have  $\|\mathcal{E}\|_2 \lesssim \lambda \sqrt{n_1}$  almost surely. By Theorem 1.1 of [13], the spectral gap of  $\text{Mat}_1(X)^\top \text{Mat}_1(X)$  is  $\Theta(\lambda^2)$ . Thus, using the Davis-Kahan theorem (see Corollary 3 of [25]), we have

$$\|\hat{v}_1 - \tilde{v}_1\|_2 \lesssim \frac{\|\mathcal{E}\|_2}{\lambda^2} \xrightarrow{a.s.} 0. \quad (4.18)$$

Let  $\text{Mat}_1(Z) = U\Lambda V^\top$  be a singular value decomposition. As  $Z$  contains i.i.d. Gaussian entries, (1)  $U$ ,  $\Lambda$ , and  $V$  are independent, (2)  $U$  and  $V$  are Haar-distributed. Moreover, as  $\tilde{v}_1$  is the first eigenvector of  $\lambda^2 v_1 v_1^\top + \text{Mat}_1(Z)^\top \text{Mat}_1(Z) = \lambda^2 v_1 v_1^\top + V\Lambda^2 V^\top$ ,  $\tilde{v}_1$  is independent of  $U$ . Thus,  $U\Lambda V^\top \tilde{v}_1 / \|\Lambda V^\top \tilde{v}_1\|_2$  is uniform on  $\mathbb{S}^{N_2-1}$ . Generating  $\xi \sim \chi_{N_2}^2$  independent of  $Z$ , it follows that

$$\frac{\xi}{\sqrt{N_2}} \cdot \frac{\text{Mat}_1(Z) \tilde{v}_1}{\|\Lambda V^\top \tilde{v}_1\|_2} \sim \mathcal{N}(0, I_{N_2}). \quad (4.19)$$

Defining the constant  $\alpha = \xi / (\sqrt{N_2} \|\Lambda V^\top \tilde{v}_1\|_2)$ , we deduce that  $\alpha Z \times_1 \tilde{v}_1$  (which is a reshaping of the left-hand side of (4.19)) is distributed as a tensor with i.i.d. Gaussian entries—despite dependencies between  $Z$  and  $\tilde{v}_1$ . Additionally, since  $\Lambda_{11} / \sqrt{N_2} \xrightarrow{a.s.} 1$  and  $\Lambda_{n_1 n_1} / \sqrt{N_2} \xrightarrow{a.s.} 1$ , we have  $\|\Lambda V^\top \tilde{v}_1\|_2 / \sqrt{N_2} \xrightarrow{a.s.} 1$  and  $\alpha \xrightarrow{a.s.} 1$ .

Thus, we conclude that

$$\alpha \text{Mat}_{j-1}(X \times_1 \tilde{v}_1) = \lambda(1 + o_{a.s.}(1)) \langle v_1, \tilde{v}_1 \rangle (\otimes_{\ell \in [k] \setminus \{1, j\}} v_\ell) v_j^\top + \tilde{Z}, \quad j \in \{2, \dots, k-1\}, \quad (4.20)$$

where  $\tilde{Z} \in \mathbb{R}^{n_j \times (N_2/n_j)}$  contains i.i.d. Gaussian entries, enabling us to apply spiked matrix results. Let  $\tilde{v}_j$  denote the first right singular vector of  $\text{Mat}_{j-1}(X \times_1 \tilde{v}_1)$  (equivalently, that of  $\alpha \text{Mat}_{j-1}(X \times_1 \tilde{v}_1)$ ); without loss of generality, we assume  $\hat{v}_1^\top \tilde{v}_1 \geq 0$ . In particular, since  $|\langle v_1, \tilde{v}_1 \rangle| \asymp |\langle v_1, \hat{v}_1 \rangle| \asymp 1$  by Corollary 2.1.1 and (4.18), Lemma 1.2 implies  $|\langle v_j, \tilde{v}_j \rangle| \xrightarrow{a.s.} 1$  (we have  $\lambda \gg (n_j \cdot N_2/n_j)^{1/4}$ ).

It therefore suffices to prove that  $\|\hat{v}_j - \tilde{v}_j\|_2 \xrightarrow{a.s.} 0$ . By Theorem 2.3 of [5] or Theorem 1.1 of [13] and Cauchy's interlacing inequality, the spectral gap of  $\text{Mat}_{j-1}(X \times_1 \tilde{v}_1)^\top \text{Mat}_{j-1}(X \times_1 \tilde{v}_1)$  is  $\Theta(\lambda^2)$ . Let  $\mathcal{Z}$  denote the reshaping of  $Z$  with dimensions  $n_1 \times n_j \times N_2/n_j$  and slices  $\text{Mat}_{j-1}(Z_i)$ ,  $i \in [n_1]$ . Using the bound

$$\|\text{Mat}_{j-1}(\mathcal{Z} \times_1 (\hat{v}_1 - \tilde{v}_1))\|_2 \leq \sup_{\substack{u_1 \in \mathbb{S}^{n_1-1}, u_2 \in \mathbb{S}^{n_j-1}, \\ u_3 \in \mathbb{S}^{N_2/n_j-1}}} (\mathcal{Z} \times_1 u_1 \times_2 u_2 \times_3 u_3) \cdot \|\hat{v}_1 - \tilde{v}_1\|_2$$

and Theorem 1 of [23],

$$\begin{aligned} \|\text{Mat}_{j-1}(X \times_1 (\hat{v}_1 - \tilde{v}_1))\|_2 &\leq \lambda \|\hat{v}_1 - \tilde{v}_1\|_2 \|\text{Mat}_{j-1}(v_2 \otimes \dots \otimes v_k)\|_2 + \|\text{Mat}_{j-1}(\mathcal{Z} \times_1 (\hat{v}_1 - \tilde{v}_1))\|_2 \\ &\lesssim (\lambda + (N_2/n_j)^{1/2}) \|\hat{v}_1 - \tilde{v}_1\|_2, \end{aligned} \quad (4.21)$$

almost surely. Thus, using the Davis-Kahan theorem (Theorem 4 of [25]), (4.18), and (4.21), we have

$$\|\hat{v}_j - \tilde{v}_j\|_2 \lesssim \frac{\lambda(\lambda + (N_2/n_j)^{1/2}) \|\hat{v}_1 - \tilde{v}_1\|_2}{\lambda^2} \xrightarrow{a.s.} 0, \quad (4.22)$$

completing the proof.  $\square$
